# Supplementary material for: A Quantitative Profiling Tool for Diverse Genomic Data Types Reveals Potential Associations between Chromatin and Pre-mRNA Processing
Source: PLoS One. 2015 Jul 24;10(7):e0132448. doi: 10.1371/journal.pone.0132448 (PMC4514851; doi:10.1371/journal.pone.0132448)
Supplement: S9 Table — This list uses the.ref format described in the text (fields separated by “.”). The id (first field) contains the coordinates of the exon in closed format, separated by “:”, and ending with the strand. The last field of each line contains the center of the CTCF peak downstream of the exon in the HepG2 sample. DS = the peak center falls in an intronic region within 1kb downstream of an internal exon. (REF) [file pone.0132448.s029.ref]

chr10:71151881:71152064:+.chr10.+.71152438
chr10:82264484:82264534:+.chr10.+.82265464
chr1:156035702:156035897:+.chr1.+.156036271
chr1:156060262:156060373:+.chr1.+.156060707
chr11:67787184:67787265:+.chr11.+.67788243
chr1:168204339:168204420:+.chr1.+.168204634
chr1:17277448:17277617:+.chr1.+.17278312
chr11:82951801:82951976:+.chr11.+.82952546
chr1:210573812:210574006:+.chr1.+.210574134
chr12:109955722:109955818:+.chr12.+.109956721
chr12:122468606:122468687:+.chr12.+.122469642
chr12:99119193:99119318:+.chr12.+.99119767
chr14:103966493:103966537:+.chr14.+.103966603
chr15:40566343:40566477:+.chr15.+.40567070
chr16:4555485:4555611:+.chr16.+.4556598
chr16:67899005:67899132:+.chr16.+.67899407
chr17:25928386:25928427:+.chr17.+.25928875
chr17:60629663:60629758:+.chr17.+.60630695
chr19:13192494:13192669:+.chr19.+.13193400
chr19:1371233:1371389:+.chr19.+.1372197
chr19:18882252:18882356:+.chr19.+.18882594
chr19:33609916:33610023:+.chr19.+.33610113
chr19:34921481:34921564:+.chr19.+.34921799
chr19:47861123:47861377:+.chr19.+.47861459
chr20:30742906:30742989:+.chr20.+.30743649
chr20:60835037:60835181:+.chr20.+.60835606
chr2:238683001:238683105:+.chr2.+.238683533
chr2:24387068:24387204:+.chr2.+.24387436
chr3:14509596:14509720:+.chr3.+.14509739
chr4:107249233:107249400:+.chr4.+.107250380
chr4:113187744:113187872:+.chr4.+.113188215
chr4:83994359:83994506:+.chr4.+.83995346
chr5:54619960:54620026:+.chr5.+.54620788
chr6:107003643:107003772:+.chr6.+.107004449
chr6:37348926:37349130:+.chr6.+.37349527
chr7:16734459:16734629:+.chr7.+.16735483
chr7:48141421:48141467:+.chr7.+.48141918
chr7:48141421:48141579:+.chr7.+.48141918
chr9:133576254:133576322:+.chr9.+.133576624
chr9:2115822:2116049:+.chr9.+.2116289
chr9:36597219:36597287:+.chr9.+.36597593
chrX:77284747:77284941:+.chrX.+.77285358
